# Supplementary material for: High-resolution density assessment assisted by deep learning of Dendrophyllia cornigera (Lamarck, 1816) and Phakellia ventilabrum (Linnaeus, 1767) in rocky circalittoral shelf of Bay of Biscay
Source: PeerJ. 2024 Mar 7;12:e17080. doi: 10.7717/peerj.17080 (PMC10924775; doi:10.7717/peerj.17080)
Supplement: Supplemental Information 2 — The raw data collected from the remotely operated towed vehicle (ROTV) used in our study. It includes various measurements and observations essential for our deep learning model to perform high-resolution mapping of key reef species in the Aviles and Capbreton Canyon Systems. [file peerj-12-17080-s002.xlsx]

## Sheet: Hoja 1
SUB1_Lon	SUB1_Lat	Water_Depth	USBL_Depth	SUB1_Altitude	Time	SHIP_COG	SUB1_COG	Temperature	Salinity	SUB1_Depth	Density	Foto
-2.72662	43.5172	92.998		1.8	13:25:37	278.03	307.6	12.2254	35.4575	91.198	26.901	ICB20_TF08_0028.JPG
-2.72665	43.5173	93.493		1.87	13:25:46	265.37	295.4	12.2094	35.4721	91.623	26.9154	ICB20_TF08_0029.JPG
-2.72668	43.5173	93.874		2.11	13:25:56	264.12	245.1	12.1834	35.4809	91.764	26.9273	ICB20_TF08_0030.JPG
-2.72671	43.5173	93.199		1.47	13:26:06	279.33	265.2	12.185	35.4729	91.729	26.9208	ICB20_TF08_0031.JPG
-2.72674	43.5173	92.314		1.47	13:26:16	295.09	266.6	12.2135	35.4545	90.844	26.901	ICB20_TF08_0032.JPG
-2.72677	43.5173	93.158		1.96	13:26:26	266.31	287.4	12.2618	35.4232	91.198	26.8673	ICB20_TF08_0033.JPG
-2.72681	43.5173	93.62		2.28	13:26:36	225.14	300	12.2487	35.4532	91.34	26.8931	ICB20_TF08_0034.JPG
-2.72684	43.5173	93.36		2.41	13:26:46	295.15	306.5	12.239	35.4559	90.95	26.8971	ICB20_TF08_0035.JPG
-2.72686	43.5173	93.492		1.55	13:26:56	296.97	321.8	12.2085	35.461	91.942	26.907	ICB20_TF08_0036.JPG
-2.72689	43.5173	94.14		1.88	13:27:06	308.8	301.4	12.1794	35.4744	92.26	26.9231	ICB20_TF08_0037.JPG
-2.72693	43.5173	94.866		2.04	13:27:16	279.49	265	12.1469	35.4842	92.826	26.937	ICB20_TF08_0038.JPG
-2.72695	43.5173	94.826		2	13:27:26	298.57	252.6	12.1547	35.4747	92.826	26.9281	ICB20_TF08_0039.JPG
-2.72697	43.5173	94.936		1.72	13:27:36	280.65	262.6	12.1699	35.4602	93.216	26.9139	ICB20_TF08_0040.JPG
-2.727	43.5173	94.404		1.4	13:27:46	290.94	275	12.1397	35.4789	93.004	26.9343	ICB20_TF08_0041.JPG
-2.72703	43.5173	94.744		1.74	13:27:57	286.42	280.4	12.1197	35.4778	93.004	26.9373	ICB20_TF08_0042.JPG
-2.72707	43.5174	94.67		1.95	13:28:07	297.52	294	12.1169	35.4757	92.72	26.9362	ICB20_TF08_0043.JPG
-2.7271	43.5174	94.354		1.74	13:28:17	295.17	305.2	12.1293	35.4712	92.614	26.9303	ICB20_TF08_0044.JPG
-2.72712	43.5174	95.196		1.59	13:28:27	285.14	311	12.1196	35.4706	93.606	26.9317	ICB20_TF08_0045.JPG
-2.72715	43.5174	95.1		1.6	13:28:36	293.94	309.5	12.1068	35.4797	93.5	26.9412	ICB20_TF08_0046.JPG
-2.72718	43.5174	95.223		1.44	13:28:47	292.3	283.3	12.0937	35.4781	93.783	26.9425	ICB20_TF08_0047.JPG
-2.72722	43.5174	95.55		1.59	13:28:57	286.16	279.5	12.0995	35.4731	93.96	26.9375	ICB20_TF08_0048.JPG
-2.72725	43.5174	95.46		1.5	13:29:07	287.02	292.9	12.109	35.4701	93.96	26.9333	ICB20_TF08_0049.JPG
-2.72728	43.5174	94.82		1.71	13:29:17	299.25	303.9	12.1106	35.4699	93.11	26.9329	ICB20_TF08_0050.JPG
-2.7273	43.5174	95.328		1.51	13:29:27	325.12	302.6	12.1405	35.4686	93.818	26.9261	ICB20_TF08_0051.JPG
-2.72733	43.5174	95.542		1.83	13:29:36	285.97	302.4	12.1186	35.4728	93.712	26.9336	ICB20_TF08_0052.JPG
-2.72737	43.5174	95.355		1.82	13:29:46	218.93	297.7	12.1289	35.4645	93.535	26.9252	ICB20_TF08_0053.JPG
-2.72739	43.5174	95.078		1.72	13:29:56	293.02	291.2	12.1242	35.4625	93.358	26.9246	ICB20_TF08_0054.JPG
-2.72743	43.5174	95.571		1.93	13:30:06	216.73	292.1	12.1175	35.4673	93.641	26.9296	ICB20_TF08_0055.JPG
-2.72746	43.5175	95.127		1.45	13:30:17	271.16	296.2	12.1164	35.4702	93.677	26.932	ICB20_TF08_0056.JPG
-2.72749	43.5175	94.848		1.88	13:30:27	286.34	301.1	12.128	35.4643	92.968	26.9252	ICB20_TF08_0057.JPG
-2.72752	43.5175	93.954		1.34	13:30:37	301.42	306.3	12.1242	35.4694	92.614	26.9299	ICB20_TF08_0058.JPG
-2.72755	43.5175	94.945		1.41	13:30:47	297.1	298.1	12.1261	35.4661	93.535	26.927	ICB20_TF08_0059.JPG
-2.72758	43.5175	94.82		1.32	13:30:57	297.61	299.3	12.1343	35.4608	93.5	26.9212	ICB20_TF08_0060.JPG
-2.72761	43.5175	95.175		1.64	13:31:07	299.91	298.4	12.131	35.4657	93.535	26.9257	ICB20_TF08_0061.JPG
-2.72764	43.5175	95.265		1.34	13:31:17	288.89	302.2	12.1425	35.4653	93.925	26.9231	ICB20_TF08_0062.JPG
-2.72767	43.5175	95.301		1.27	13:31:26	294.96	311.3	12.1458	35.4639	94.031	26.9214	ICB20_TF08_0063.JPG
-2.7277	43.5175	95.894		1.58	13:31:37	286.69	313.3	12.1506	35.4669	94.314	26.9228	ICB20_TF08_0064.JPG
-2.72773	43.5175	95.647		1.51	13:31:46	294.37	288.5	12.1522	35.4638	94.137	26.9201	ICB20_TF08_0065.JPG
-2.72776	43.5175	95.463		1.29	13:31:56	276.61	232.2	12.132	35.4697	94.173	26.9286	ICB20_TF08_0066.JPG
-2.72779	43.5175	95.053		1.27	13:32:06	298.32	251.4	12.1314	35.4742	93.783	26.9323	ICB20_TF08_0067.JPG
-2.72782	43.5175	95.778		1.96	13:32:17	272.41	310.3	12.1215	35.4783	93.818	26.9373	ICB20_TF08_0068.JPG
-2.72785	43.5175	94.768		1.8	13:32:27	283.88	318	12.1848	35.425	92.968	26.8836	ICB20_TF08_0069.JPG
-2.72788	43.5176	94.24		2.44	13:32:37	290.38	317.4	12.187	35.4831	91.8	26.9284	ICB20_TF08_0070.JPG
-2.7279	43.5176	93.64		1.38	13:32:47	282.33	321.1	12.2265	35.4512	92.26	26.8959	ICB20_TF08_0071.JPG
-2.72793	43.5176	93.814		1.59	13:32:57	291.93	318.9	12.1628	35.4943	92.224	26.9418	ICB20_TF08_0072.JPG
-2.72796	43.5176	94.714		2.1	13:33:06	173.56	319	12.1546	35.4741	92.614	26.9276	ICB20_TF08_0073.JPG
-2.72798	43.5176	94.338		2.22	13:33:16	251.68	303.2	12.1599	35.4658	92.118	26.9202	ICB20_TF08_0074.JPG
-2.72802	43.5176	93.556		1.72	13:33:26	297.23	298.4	12.1724	35.447	91.836	26.9031	ICB20_TF08_0075.JPG
-2.72805	43.5176	94.05		2.18	13:33:36	294.61	294.6	12.178	35.4537	91.87	26.9073	ICB20_TF08_0076.JPG
-2.72808	43.5176	94.656		1.9	13:33:46	297.23	291.9	12.1492	35.4698	92.756	26.9253	ICB20_TF08_0077.JPG
-2.72812	43.5176	94.508		2	13:33:56	291.98	290.5	12.1033	35.4781	92.508	26.9407	ICB20_TF08_0078.JPG
-2.72815	43.5176	94.348		1.91	13:34:06	291.46	294.8	12.1345	35.4626	92.438	26.9226	ICB20_TF08_0079.JPG
-2.72817	43.5176	94.236		1.41	13:34:16	291.29	296.8	12.1585	35.4504	92.826	26.9085	ICB20_TF08_0080.JPG
-2.7282	43.5176	95.02		1.45	13:34:26	292.14	301.5	12.1454	35.4634	93.57	26.9211	ICB20_TF08_0081.JPG
-2.72824	43.5176	94.776		1.63	13:34:36	292.12	302.1	12.1112	35.4814	93.146	26.9417	ICB20_TF08_0082.JPG
-2.72826	43.5176	95.214		1.75	13:34:46	295.68	297.2	12.1191	35.4667	93.464	26.9287	ICB20_TF08_0083.JPG
-2.7283	43.5177	95.603		1.82	13:34:56	271.41	294	12.1042	35.4708	93.783	26.9349	ICB20_TF08_0084.JPG
-2.72833	43.5177	95.971		1.55	13:35:06	254.43	297.2	12.1053	35.4755	94.421	26.9383	ICB20_TF08_0085.JPG
-2.72836	43.5177	95.062		1.81	13:35:16	270.44	291.5	12.0997	35.4721	93.252	26.9367	ICB20_TF08_0086.JPG
-2.72839	43.5177	94.902		2.04	13:35:26	230.38	294.9	12.1491	35.4386	92.862	26.9012	ICB20_TF08_0087.JPG
-2.72843	43.5177	95.068		2.1	13:35:36	277.3	298.5	12.1922	35.4133	92.968	26.8731	ICB20_TF08_0088.JPG
-2.72846	43.5177	95.27		2.16	13:35:47	291.46	307.1	12.1994	35.4365	93.11	26.8898	ICB20_TF08_0089.JPG
-2.72848	43.5177	95.767		1.63	13:35:56	274.57	323.8	12.1588	35.464	94.137	26.919	ICB20_TF08_0090.JPG
-2.72851	43.5177	96.185		1.8	13:36:07	262.91	329.6	12.1016	35.4896	94.385	26.95	ICB20_TF08_0091.JPG
-2.72853	43.5177	95.385		1.39	13:36:16	297.67	330.6	12.1083	35.4845	93.995	26.9447	ICB20_TF08_0092.JPG
-2.72858	43.5177	95.078		1.33	13:36:27	302.48	279.6	12.1316	35.4678	93.748	26.9272	ICB20_TF08_0093.JPG
-2.7286	43.5177	95.201		1.56	13:36:36	297.03	253.7	12.1156	35.4677	93.641	26.9302	ICB20_TF08_0094.JPG
-2.72864	43.5177	95.878		1.67	13:36:47	294.43	267.9	12.1132	35.4724	94.208	26.9344	ICB20_TF08_0095.JPG
-2.72866	43.5177	95.569		1.68	13:36:57	301.36	282.4	12.0976	35.481	93.889	26.9441	ICB20_TF08_0096.JPG
-2.72869	43.5177	95.288		1.47	13:37:06	293.81	291.4	12.1349	35.4671	93.818	26.926	ICB20_TF08_0097.JPG
-2.72872	43.5178	95.829		1.48	13:37:16	305.47	303.1	12.1414	35.4569	94.349	26.9168	ICB20_TF08_0098.JPG
-2.72875	43.5178	95.726		1.27	13:37:26	297.81	308.6	12.1247	35.4586	94.456	26.9214	ICB20_TF08_0099.JPG
-2.72878	43.5178	95.477		1.34	13:37:36	300.74	317.3	12.1123	35.4786	94.137	26.9393	ICB20_TF08_0100.JPG
-2.72882	43.5178	95.682		1.58	13:37:47	295.47	269.1	12.1277	35.461	94.102	26.9227	ICB20_TF08_0101.JPG
-2.72885	43.5178	96.177		2.04	13:37:57	302.42	281.2	12.0897	35.4723	94.137	26.9388	ICB20_TF08_0102.JPG
-2.72887	43.5178	95.58		1.62	13:38:06	300.53	283.9	12.0882	35.4735	93.96	26.9401	ICB20_TF08_0103.JPG
-2.7289	43.5178	95.697		1.56	13:38:16	302.32	279.2	12.0969	35.4723	94.137	26.9374	ICB20_TF08_0104.JPG
-2.72893	43.5178	95.458		1.25	13:38:27	304.18	281	12.1153	35.4721	94.208	26.9337	ICB20_TF08_0105.JPG
-2.72896	43.5178	95.652		1.55	13:38:36	301.43	286.1	12.1221	35.4631	94.102	26.9254	ICB20_TF08_0106.JPG
-2.72899	43.5178	95.491		1.46	13:38:46	304.67	293.3	12.1281	35.4566	94.031	26.9192	ICB20_TF08_0107.JPG
-2.72902	43.5178	95.638		1.43	13:38:56	299.7	295.1	12.1304	35.4568	94.208	26.9189	ICB20_TF08_0108.JPG
-2.72906	43.5178	96.001		1.51	13:39:06	307.9	296.7	12.1503	35.4604	94.491	26.9178	ICB20_TF08_0109.JPG
-2.72909	43.5178	96.226		1.77	13:39:17	302.22	300.3	12.1566	35.4622	94.456	26.918	ICB20_TF08_0110.JPG
-2.72912	43.5178	96.036		1.58	13:39:26	311.99	304.7	12.1752	35.4559	94.456	26.9095	ICB20_TF08_0111.JPG
-2.72915	43.5179	95.415		1.49	13:39:37	314.79	314.3	12.1922	35.4377	93.925	26.8921	ICB20_TF08_0112.JPG
-2.72918	43.5179	95.453		1.67	13:39:46	305.81	312.5	12.2089	35.4248	93.783	26.8788	ICB20_TF08_0113.JPG
-2.72922	43.5179	96.345		1.96	13:39:57	294.98	258.9	12.2231	35.4372	94.385	26.8857	ICB20_TF08_0114.JPG
-2.72924	43.5179	96.453		1.82	13:40:07	300.44	274.3	12.2086	35.4577	94.633	26.9044	ICB20_TF08_0115.JPG
-2.72927	43.5179	96.237		1.64	13:40:16	294.85	299.8	12.212	35.4573	94.597	26.9034	ICB20_TF08_0116.JPG
-2.7293	43.5179	96.127		1.6	13:40:26	210.35	307.6	12.1986	35.4627	94.527	26.9103	ICB20_TF08_0117.JPG
-2.72933	43.5179	96.671		2.18	13:40:36	232.74	310.5	12.1845	35.4666	94.491	26.916	ICB20_TF08_0118.JPG
-2.72936	43.5179	96.083		1.91	13:40:46	288.58	297.3	12.2142	35.4515	94.173	26.8985	ICB20_TF08_0119.JPG
-2.72939	43.5179	96.029		1.75	13:40:56	292.07	309.1	12.2087	35.4429	94.279	26.8929	ICB20_TF08_0120.JPG
-2.72942	43.5179	95.758		1.55	13:41:06	286.63	324.6	12.2191	35.4458	94.208	26.8931	ICB20_TF08_0121.JPG
-2.72945	43.5179	95.568		1.36	13:41:16	298.24	331.3	12.2367	35.4464	94.208	26.8902	ICB20_TF08_0122.JPG
-2.72947	43.5179	95.969		1.62	13:41:27	303.22	345.7	12.2259	35.4537	94.349	26.8979	ICB20_TF08_0123.JPG
-2.72951	43.5179	95.565		1.57	13:41:36	300.06	264.1	12.2182	35.4587	93.995	26.9033	ICB20_TF08_0124.JPG
-2.72954	43.5179	96.471		2.05	13:41:47	262.37	264.7	12.2136	35.4598	94.421	26.9051	ICB20_TF08_0125.JPG
-2.72957	43.518	96.93		2.12	13:41:56	243.6	277.1	12.1857	35.4732	94.81	26.9209	ICB20_TF08_0126.JPG
-2.7296	43.518	96.563		1.93	13:42:06	306.14	276.9	12.1988	35.4633	94.633	26.9107	ICB20_TF08_0127.JPG
-2.72963	43.518	96.457		1.93	13:42:16	287.9	288.7	12.1917	35.4725	94.527	26.9192	ICB20_TF08_0128.JPG
-2.72966	43.518	96.369		2.02	13:42:26	293.34	298.9	12.2103	35.4548	94.349	26.9019	ICB20_TF08_0129.JPG
-2.72969	43.518	96.687		2.16	13:42:36	293.32	313.9	12.2058	35.4605	94.527	26.9071	ICB20_TF08_0130.JPG
-2.72972	43.518	96.805		2.03	13:42:46	276.04	326	12.2204	35.4599	94.775	26.9039	ICB20_TF08_0131.JPG
-2.72975	43.518	96.629		1.89	13:42:56	271.61	272.4	12.2153	35.4694	94.739	26.9122	ICB20_TF08_0132.JPG
-2.72979	43.518	96.857		1.87	13:43:06	280.99	271.6	12.2144	35.4607	94.987	26.9056	ICB20_TF08_0133.JPG
-2.72982	43.518	97.469		2.27	13:43:16	195.29	286.2	12.1733	35.4912	95.199	26.9373	ICB20_TF08_0134.JPG
-2.72985	43.518	97.173		2.15	13:43:26	257.51	282.7	12.1182	35.4779	95.023	26.9377	ICB20_TF08_0135.JPG
-2.72988	43.518	96.616		1.7	13:43:37	296.03	296.7	12.1302	35.4729	94.916	26.9315	ICB20_TF08_0136.JPG
-2.72991	43.518	96.665		1.82	13:43:47	292.83	307.9	12.1492	35.4677	94.845	26.9237	ICB20_TF08_0137.JPG
-2.72994	43.518	97.361		2.09	13:43:56	274.44	320.7	12.1453	35.4688	95.271	26.9253	ICB20_TF08_0138.JPG
-2.72996	43.5181	97.405		2.17	13:44:06	282.28	314.6	12.1429	35.4685	95.235	26.9256	ICB20_TF08_0139.JPG
-2.73	43.5181	96.853		1.76	13:44:16	311.3	275	12.1564	35.4671	95.093	26.9218	ICB20_TF08_0140.JPG
-2.73003	43.5181	97.455		1.83	13:44:26	284.22	265.8	12.1327	35.4787	95.625	26.9355	ICB20_TF08_0141.JPG
-2.73006	43.5181	97.033		1.48	13:44:36	280.51	279.3	12.1156	35.4873	95.553	26.9454	ICB20_TF08_0142.JPG
-2.73009	43.5181	95.911		1.49	13:44:46	302.69	289.4	12.1412	35.4653	94.421	26.9234	ICB20_TF08_0143.JPG
-2.73012	43.5181	96.181		1.76	13:44:56	299.78	299.1	12.2003	35.4381	94.421	26.8908	ICB20_TF08_0144.JPG
-2.73015	43.5181	96.436		1.98	13:45:06	297.54	307.7	12.2298	35.4311	94.456	26.8797	ICB20_TF08_0145.JPG
-2.73018	43.5181	96.542		1.98	13:45:16	324.01	318.3	12.242	35.4331	94.562	26.8789	ICB20_TF08_0146.JPG
-2.73021	43.5181	96.298		2.09	13:45:26	302.29	320.7	12.2552	35.4206	94.208	26.8666	ICB20_TF08_0147.JPG
-2.73024	43.5181	96.24		2.28	13:45:36	295.57	306.2	12.2671	35.4319	93.96	26.873	ICB20_TF08_0148.JPG
-2.73026	43.5181	97.537		2.55	13:45:46	275.02	307.7	12.2755	35.4291	94.987	26.8692	ICB20_TF08_0149.JPG
-2.73029	43.5181	98.187		1.96	13:45:56	225.97	315.4	12.0919	35.4953	96.227	26.9562	ICB20_TF08_0150.JPG
-2.73032	43.5181	98.891		2.7	13:46:06	150.16	305.4	12.1246	35.4694	96.191	26.9298	ICB20_TF08_0151.JPG
-2.73035	43.5181	97.849		2.65	13:46:16	230.73	292.7	12.3043	35.4312	95.199	26.8652	ICB20_TF08_0152.JPG
-2.73038	43.5181	97.019		1.89	13:46:26	300.57	294.5	12.2909	35.441	95.129	26.8755	ICB20_TF08_0153.JPG
-2.73042	43.5182	96.985		1.75	13:46:36	288.15	300.4	12.2407	35.4545	95.235	26.8957	ICB20_TF08_0154.JPG
-2.73045	43.5182	96.593		1.57	13:46:47	297.68	308.9	12.191	35.487	95.023	26.9306	ICB20_TF08_0155.JPG
-2.73048	43.5182	96.963		1.94	13:46:56	299	308.3	12.1877	35.4635	95.023	26.913	ICB20_TF08_0156.JPG
-2.7305	43.5182	96.773		1.22	13:47:06	303.47	296.3	12.1186	35.478	95.553	26.9376	ICB20_TF08_0157.JPG
-2.73054	43.5182	97.069		1.41	13:47:16	294.35	285.1	12.0891	35.4844	95.659	26.9483	ICB20_TF08_0158.JPG
-2.73057	43.5182	97.563		1.69	13:47:26	293.06	286.9	12.0982	35.4837	95.873	26.946	ICB20_TF08_0159.JPG
-2.7306	43.5182	98.164		2.15	13:47:36	261.31	292.8	12.095	35.4765	96.014	26.9411	ICB20_TF08_0160.JPG
-2.73064	43.5182	97.851		2.12	13:47:46	275.97	299.3	12.1107	35.4674	95.731	26.9309	ICB20_TF08_0161.JPG
-2.73066	43.5182	97.985		2.36	13:47:56	249.48	316.4	12.1239	35.4648	95.625	26.9264	ICB20_TF08_0162.JPG
-2.73069	43.5182	98.145		2.06	13:48:06	263.46	324.5	12.1025	35.479	96.085	26.9416	ICB20_TF08_0163.JPG
-2.73072	43.5182	98.111		1.92	13:48:16	275.2	300.7	12.1029	35.4747	96.191	26.9381	ICB20_TF08_0164.JPG
-2.73075	43.5182	97.893		1.95	13:48:27	298.74	290.8	12.1256	35.4632	95.943	26.9248	ICB20_TF08_0165.JPG
-2.73079	43.5182	97.98		1.86	13:48:37	300.56	308.9	12.1394	35.4624	96.12	26.9215	ICB20_TF08_0166.JPG
-2.73081	43.5183	98.312		1.59	13:48:46	294.72	321.4	12.1112	35.4789	96.722	26.9398	ICB20_TF08_0167.JPG
-2.73084	43.5183	98.065		1.52	13:48:56	306.99	291.4	12.1174	35.474	96.545	26.9348	ICB20_TF08_0168.JPG
-2.73087	43.5183	98.097		1.8	13:49:06	303.49	294.2	12.0952	35.4819	96.297	26.9452	ICB20_TF08_0169.JPG
-2.73089	43.5183	98.229		1.33	13:49:16	301.21	312.9	12.1012	35.4692	96.899	26.9342	ICB20_TF08_0170.JPG
-2.73092	43.5183	98.215		1.28	13:49:26	292.86	315	12.0917	35.474	96.935	26.9397	ICB20_TF08_0171.JPG
-2.73095	43.5183	98.29		1.32	13:49:36	293.42	309.9	12.0887	35.4792	96.97	26.9443	ICB20_TF08_0172.JPG
-2.73098	43.5183	98.181		1.14	13:49:46	298.74	300.7	12.0773	35.4807	97.041	26.9477	ICB20_TF08_0173.JPG
-2.73101	43.5183	98.585		1.58	13:49:56	293.3	287.7	12.0927	35.4726	97.005	26.9385	ICB20_TF08_0174.JPG
-2.73105	43.5183	98.243		1.45	13:50:06	297.5	287	12.096	35.4718	96.793	26.9372	ICB20_TF08_0175.JPG
-2.73108	43.5183	98.353		1.56	13:50:16	302.75	296.9	12.0946	35.471	96.793	26.9369	ICB20_TF08_0176.JPG
-2.73111	43.5183	97.927		1.24	13:50:26	293.15	306.6	12.0827	35.4743	96.687	26.9417	ICB20_TF08_0177.JPG
-2.73114	43.5183	97.449		1.79	13:50:36	298.68	312.5	12.0907	35.4694	95.659	26.9364	ICB20_TF08_0178.JPG
-2.73116	43.5183	98.169		2.12	13:50:46	136.38	317.8	12.1257	35.4662	96.049	26.9271	ICB20_TF08_0179.JPG
-2.73119	43.5183	97.539		1.95	13:50:56	304.01	313.7	12.1359	35.4615	95.589	26.9214	ICB20_TF08_0180.JPG
-2.73123	43.5183	97.721		1.92	13:51:07	304.26	302.9	12.1544	35.4482	95.801	26.9076	ICB20_TF08_0181.JPG
-2.73126	43.5184	98.287		2.06	13:51:17	253.88	302.9	12.1714	35.4601	96.227	26.9135	ICB20_TF08_0182.JPG
-2.73129	43.5184	98.285		2.2	13:51:26	231.83	308.5	12.1412	35.4701	96.085	26.9272	ICB20_TF08_0183.JPG
-2.73132	43.5184	97.889		1.91	13:51:37	310.34	310.4	12.1393	35.4686	95.979	26.9263	ICB20_TF08_0184.JPG
-2.73135	43.5184	97.297		1.46	13:51:47	296.27	316.2	12.155	35.4574	95.837	26.9146	ICB20_TF08_0185.JPG
-2.73138	43.5184	97.797		1.57	13:51:56	301.12	325.2	12.168	35.4652	96.227	26.9181	ICB20_TF08_0186.JPG
-2.73141	43.5184	98.983		2.19	13:52:07	155.62	293	12.1542	35.446	96.793	26.9059	ICB20_TF08_0187.JPG
-2.73144	43.5184	98.998		2.24	13:52:17	178.46	286.7	12.1129	35.4583	96.758	26.9235	ICB20_TF08_0188.JPG
-2.73147	43.5184	98.455		2.37	13:52:27	264.55	280.1	12.0879	35.4628	96.085	26.9318	ICB20_TF08_0189.JPG
-2.7315	43.5184	98		1.88	13:52:37	293.33	282.7	12.1226	35.466	96.12	26.9275	ICB20_TF08_0190.JPG
-2.73153	43.5184	97.905		1.75	13:52:47	305.58	292.3	12.1423	35.4607	96.155	26.9196	ICB20_TF08_0191.JPG
-2.73156	43.5184	97.738		1.37	13:52:57	310.26	297.5	12.149	35.4621	96.368	26.9194	ICB20_TF08_0192.JPG
-2.73159	43.5184	97.885		1.73	13:53:06	296.94	299.8	12.1218	35.4786	96.155	26.9375	ICB20_TF08_0193.JPG
-2.73162	43.5184	98.278		1.91	13:53:16	295.41	300.7	12.1013	35.4778	96.368	26.9408	ICB20_TF08_0194.JPG
-2.73165	43.5185	98.064		1.2	13:53:26	291.11	298.1	12.1292	35.4519	96.864	26.9153	ICB20_TF08_0195.JPG
-2.73168	43.5185	99.042		2.32	13:53:37	171.76	299.4	12.1187	35.4734	96.722	26.9341	ICB20_TF08_0196.JPG
-2.73172	43.5185	98.927		2.24	13:53:47	246.85	293	12.1383	35.464	96.687	26.9229	ICB20_TF08_0197.JPG
-2.73175	43.5185	98.025		1.87	13:53:56	270.99	287.7	12.1696	35.4632	96.155	26.9163	ICB20_TF08_0198.JPG
-2.73178	43.5185	98.059		2.01	13:54:06	295.56	296.8	12.1581	35.4664	96.049	26.921	ICB20_TF08_0199.JPG
-2.73181	43.5185	97.414		1.4	13:54:16	294.97	305.9	12.1406	35.4766	96.014	26.9323	ICB20_TF08_0200.JPG
-2.73184	43.5185	97.863		1.53	13:54:26	295.26	311	12.1207	35.4777	96.333	26.937	ICB20_TF08_0201.JPG
-2.73186	43.5185	99.062		2.34	13:54:36	214.08	311.2	12.1481	35.4746	96.722	26.9293	ICB20_TF08_0202.JPG
-2.73189	43.5185	99.143		2.35	13:54:46	153.54	308	12.1266	35.4667	96.793	26.9274	ICB20_TF08_0203.JPG
-2.73192	43.5185	98.741		2.16	13:54:56	234.38	294.2	12.14	35.4575	96.581	26.9176	ICB20_TF08_0204.JPG
-2.73195	43.5185	98.298		1.93	13:55:06	286.8	285.7	12.1506	35.4715	96.368	26.9264	ICB20_TF08_0205.JPG
-2.73198	43.5185	98.614		2.14	13:55:16	245.56	291.3	12.1469	35.4643	96.474	26.9215	ICB20_TF08_0206.JPG
-2.73201	43.5185	98.727		2.04	13:55:26	242.36	299.5	12.0953	35.4816	96.687	26.945	ICB20_TF08_0207.JPG
