# Supplementary material for: High-resolution density assessment assisted by deep learning of Dendrophyllia cornigera (Lamarck, 1816) and Phakellia ventilabrum (Linnaeus, 1767) in rocky circalittoral shelf of Bay of Biscay
Source: PeerJ. 2024 Mar 7;12:e17080. doi: 10.7717/peerj.17080 (PMC10924775; doi:10.7717/peerj.17080)
Supplement: Supplemental Information 5 — The final data used for creating high-resolution species density maps in our study. This data, generated by our deep learning model, was used in QGIS to visualize the distribution of key reef species in the Aviles and Capbreton Canyon Systems. [file peerj-12-17080-s005.xlsx]

## Sheet: Sheet1
Image	Phakellia	Dendrophyllia	SUB1_Lon	SUB1_Lat	area_m2	Phakellia_m2	Dendrophyllia_m2
ICB20_TF08_0035.JPG	10	14	-2.72684	43.5173	1.10722	9.03162	12.6443
ICB20_TF08_0034.JPG	10	12	-2.72681	43.5173	1.12768	8.86773	10.6413
ICB20_TF08_0074.JPG	11	9	-2.72798	43.5176	1.13732	9.67186	7.91334
ICB20_TF08_0038.JPG	1	9	-2.72693	43.5173	1.16698	0.856911	7.7122
ICB20_TF08_0028.JPG	10	9	-2.72662	43.5172	1.20837	8.2756	7.44804
ICB20_TF08_0032.JPG	15	8	-2.72674	43.5173	1.26897	11.8206	6.3043
ICB20_TF08_0075.JPG	11	7	-2.72802	43.5176	1.22266	8.99679	5.72523
ICB20_TF08_0031.JPG	5	7	-2.72671	43.5173	1.26897	3.94019	5.51627
ICB20_TF08_0092.JPG	1	7	-2.72853	43.5177	1.28435	0.778603	5.45022
ICB20_TF08_0203.JPG	0	6	-2.73189	43.5185	1.1166	0	5.37348
ICB20_TF08_0206.JPG	0	6	-2.73198	43.5185	1.15036	0	5.21575
ICB20_TF08_0126.JPG	2	6	-2.72957	43.518	1.15366	1.73362	5.20085
ICB20_TF08_0039.JPG	0	6	-2.72695	43.5173	1.17373	0	5.1119
ICB20_TF08_0205.JPG	4	6	-2.73195	43.5185	1.18568	3.37358	5.06037
ICB20_TF08_0037.JPG	1	6	-2.72689	43.5173	1.19433	0.837287	5.02372
ICB20_TF08_0054.JPG	2	6	-2.72739	43.5174	1.22266	1.63578	4.90734
ICB20_TF08_0058.JPG	1	6	-2.72752	43.5175	1.29411	0.772734	4.63641
ICB20_TF08_0118.JPG	4	5	-2.72933	43.5179	1.14381	3.49707	4.37134
ICB20_TF08_0204.JPG	0	5	-2.73192	43.5185	1.14708	0	4.35889
ICB20_TF08_0073.JPG	15	5	-2.72796	43.5176	1.15697	12.9649	4.32164
ICB20_TF08_0053.JPG	1	5	-2.72737	43.5174	1.20484	0.829987	4.14993
ICB20_TF08_0083.JPG	2	5	-2.72826	43.5176	1.21727	1.64302	4.10755
ICB20_TF08_0036.JPG	2	5	-2.72686	43.5173	1.25387	1.59506	3.98765
ICB20_TF08_0056.JPG	1	5	-2.72746	43.5175	1.27279	0.785674	3.92837
ICB20_TF08_0059.JPG	1	5	-2.72755	43.5175	1.28048	0.780956	3.90478
ICB20_TF08_0070.JPG	3	4	-2.72788	43.5176	1.10258	2.7209	3.62786
ICB20_TF08_0030.JPG	6	4	-2.72668	43.5173	1.15531	5.19341	3.46227
ICB20_TF08_0199.JPG	3	4	-2.73178	43.5185	1.17204	2.55964	3.41286
ICB20_TF08_0068.JPG	5	4	-2.72782	43.5175	1.18054	4.23535	3.38828
ICB20_TF08_0114.JPG	4	4	-2.72922	43.5179	1.18054	3.38828	3.38828
ICB20_TF08_0127.JPG	2	4	-2.7296	43.518	1.18568	1.68679	3.37358
ICB20_TF08_0194.JPG	1	4	-2.73162	43.5184	1.18913	0.840949	3.3638
ICB20_TF08_0120.JPG	2	4	-2.72939	43.5179	1.21727	1.64302	3.28604
ICB20_TF08_0044.JPG	0	4	-2.7271	43.5174	1.21906	0	3.28121
ICB20_TF08_0159.JPG	3	4	-2.73057	43.5182	1.22808	2.44284	3.25711
ICB20_TF08_0048.JPG	5	4	-2.72722	43.5174	1.24642	4.01149	3.20919
ICB20_TF08_0155.JPG	3	4	-2.73045	43.5182	1.25014	2.39974	3.19965
ICB20_TF08_0186.JPG	0	4	-2.73138	43.5184	1.25014	0	3.19965
ICB20_TF08_0112.JPG	2	4	-2.72915	43.5179	1.26517	1.58081	3.16162
ICB20_TF08_0200.JPG	3	4	-2.73181	43.5185	1.28241	2.33934	3.11912
ICB20_TF08_0122.JPG	3	4	-2.72945	43.5179	1.29019	2.32524	3.10032
ICB20_TF08_0152.JPG	0	3	-2.73035	43.5181	1.07088	0	2.80144
ICB20_TF08_0149.JPG	4	3	-2.73026	43.5181	1.0858	3.68392	2.76294
ICB20_TF08_0202.JPG	2	3	-2.73186	43.5185	1.11817	1.78864	2.68296
ICB20_TF08_0187.JPG	3	3	-2.73141	43.5184	1.14219	2.62654	2.62654
ICB20_TF08_0089.JPG	3	3	-2.72846	43.5177	1.14708	2.61533	2.61533
ICB20_TF08_0130.JPG	0	3	-2.72969	43.518	1.14708	0	2.61533
ICB20_TF08_0125.JPG	5	3	-2.72954	43.5179	1.1653	4.29073	2.57444
ICB20_TF08_0087.JPG	11	3	-2.72839	43.5177	1.16698	9.42602	2.57073
ICB20_TF08_0207.JPG	2	3	-2.73201	43.5185	1.16698	1.71382	2.57073
ICB20_TF08_0131.JPG	2	3	-2.72972	43.518	1.16866	1.71136	2.56703
ICB20_TF08_0055.JPG	7	3	-2.72743	43.5174	1.18568	5.90377	2.53019
ICB20_TF08_0181.JPG	1	3	-2.73123	43.5183	1.18741	0.842172	2.52652
ICB20_TF08_0057.JPG	6	3	-2.72749	43.5175	1.19433	5.02372	2.51186
ICB20_TF08_0029.JPG	1	3	-2.72665	43.5173	1.19607	0.836068	2.5082
ICB20_TF08_0052.JPG	4	3	-2.72733	43.5174	1.20308	3.3248	2.4936
ICB20_TF08_0115.JPG	7	3	-2.72924	43.5179	1.20484	5.80991	2.48996
ICB20_TF08_0072.JPG	6	3	-2.72793	43.5176	1.24642	4.81379	2.40689
ICB20_TF08_0111.JPG	1	3	-2.72912	43.5178	1.24828	0.801105	2.40331
ICB20_TF08_0051.JPG	2	3	-2.7273	43.5174	1.26139	1.58555	2.37833
ICB20_TF08_0183.JPG	2	2	-2.73129	43.5184	1.14056	1.75352	1.75352
ICB20_TF08_0076.JPG	2	2	-2.72805	43.5176	1.14381	1.74854	1.74854
ICB20_TF08_0160.JPG	3	2	-2.7306	43.5182	1.14872	2.6116	1.74107
ICB20_TF08_0161.JPG	0	2	-2.73064	43.5182	1.15366	0	1.73362
ICB20_TF08_0129.JPG	1	2	-2.72966	43.518	1.17035	0.854446	1.70889
ICB20_TF08_0078.JPG	2	2	-2.72812	43.5176	1.17373	1.70397	1.70397
ICB20_TF08_0033.JPG	14	2	-2.72677	43.5173	1.18054	11.859	1.69414
ICB20_TF08_0128.JPG	1	2	-2.72963	43.518	1.18568	0.843395	1.68679
ICB20_TF08_0119.JPG	4	2	-2.72936	43.5179	1.18913	3.3638	1.6819
ICB20_TF08_0077.JPG	0	2	-2.72808	43.5176	1.19086	0	1.67946
ICB20_TF08_0132.JPG	4	2	-2.72975	43.518	1.1926	3.35403	1.67701
ICB20_TF08_0198.JPG	2	2	-2.73175	43.5185	1.19607	1.67214	1.67214
ICB20_TF08_0178.JPG	2	2	-2.73114	43.5183	1.21014	1.6527	1.6527
ICB20_TF08_0110.JPG	2	2	-2.72909	43.5178	1.2137	1.64785	1.64785
ICB20_TF08_0154.JPG	4	2	-2.73042	43.5182	1.21727	3.28604	1.64302
ICB20_TF08_0040.JPG	0	2	-2.72697	43.5173	1.22266	0	1.63578
ICB20_TF08_0085.JPG	2	2	-2.72833	43.5177	1.25387	1.59506	1.59506
ICB20_TF08_0121.JPG	1	2	-2.72942	43.5179	1.25387	0.79753	1.59506
ICB20_TF08_0049.JPG	2	2	-2.72725	43.5174	1.26328	1.58318	1.58318
ICB20_TF08_0185.JPG	2	2	-2.73135	43.5184	1.27088	1.57371	1.57371
ICB20_TF08_0047.JPG	2	2	-2.72718	43.5174	1.27471	1.56899	1.56899
ICB20_TF08_0099.JPG	2	2	-2.72875	43.5178	1.30795	1.52911	1.52911
ICB20_TF08_0157.JPG	3	2	-2.7305	43.5182	1.31797	2.27622	1.51748
ICB20_TF08_0162.JPG	1	1	-2.73066	43.5182	1.11502	0.896841	0.896841
ICB20_TF08_0196.JPG	3	1	-2.73168	43.5185	1.12133	2.6754	0.8918
ICB20_TF08_0148.JPG	4	1	-2.73024	43.5181	1.12768	3.54709	0.886773
ICB20_TF08_0179.JPG	4	1	-2.73116	43.5183	1.15366	3.46723	0.866808
ICB20_TF08_0088.JPG	12	1	-2.72843	43.5177	1.15697	10.3719	0.864329
ICB20_TF08_0163.JPG	1	1	-2.73069	43.5182	1.16363	0.85938	0.85938
ICB20_TF08_0180.JPG	9	1	-2.73119	43.5183	1.18225	7.6126	0.845845
ICB20_TF08_0043.JPG	3	1	-2.72707	43.5174	1.18225	2.53753	0.845845
ICB20_TF08_0165.JPG	0	1	-2.73075	43.5182	1.18225	0	0.845845
ICB20_TF08_0156.JPG	2	1	-2.73048	43.5182	1.18397	1.68924	0.844619
ICB20_TF08_0164.JPG	0	1	-2.73072	43.5182	1.18741	0	0.842172
ICB20_TF08_0184.JPG	1	1	-2.73132	43.5184	1.18913	0.840949	0.840949
ICB20_TF08_0153.JPG	0	1	-2.73038	43.5181	1.1926	0	0.838507
ICB20_TF08_0069.JPG	5	1	-2.72785	43.5175	1.20837	4.1378	0.82756
ICB20_TF08_0091.JPG	2	1	-2.72851	43.5177	1.20837	1.65512	0.82756
ICB20_TF08_0096.JPG	0	1	-2.72866	43.5177	1.2299	0	0.813077
ICB20_TF08_0113.JPG	4	1	-2.72918	43.5179	1.23172	3.2475	0.811875
ICB20_TF08_0116.JPG	1	1	-2.72927	43.5179	1.2372	0.808277	0.808277
ICB20_TF08_0090.JPG	1	1	-2.72848	43.5177	1.23904	0.80708	0.80708
ICB20_TF08_0123.JPG	5	1	-2.72947	43.5179	1.24088	4.02941	0.805883
ICB20_TF08_0117.JPG	1	1	-2.7293	43.5179	1.24457	0.803492	0.803492
ICB20_TF08_0101.JPG	1	1	-2.72882	43.5178	1.24828	0.801105	0.801105
ICB20_TF08_0104.JPG	1	1	-2.7289	43.5178	1.252	0.798721	0.798721
ICB20_TF08_0106.JPG	0	1	-2.72896	43.5178	1.25387	0	0.79753
ICB20_TF08_0201.JPG	2	1	-2.73184	43.5185	1.25762	1.5903	0.795152
ICB20_TF08_0109.JPG	0	1	-2.72906	43.5178	1.26139	0	0.792777
ICB20_TF08_0107.JPG	1	1	-2.72899	43.5178	1.27088	0.786856	0.786856
ICB20_TF08_0081.JPG	2	1	-2.7282	43.5176	1.27279	1.57135	0.785674
ICB20_TF08_0175.JPG	1	1	-2.73105	43.5183	1.27279	0.785674	0.785674
ICB20_TF08_0108.JPG	1	1	-2.72902	43.5178	1.27663	0.783313	0.783313
ICB20_TF08_0080.JPG	0	1	-2.72817	43.5176	1.28048	0	0.780956
ICB20_TF08_0041.JPG	2	1	-2.727	43.5173	1.28241	1.55956	0.779779
ICB20_TF08_0060.JPG	2	1	-2.72758	43.5175	1.29804	1.54079	0.770393
ICB20_TF08_0067.JPG	3	1	-2.72779	43.5175	1.30795	2.29367	0.764556
ICB20_TF08_0145.JPG	8	0	-2.73015	43.5181	1.17713	6.7962	0
ICB20_TF08_0146.JPG	7	0	-2.73018	43.5181	1.17713	5.94668	0
ICB20_TF08_0086.JPG	7	0	-2.72836	43.5177	1.2066	5.80141	0
ICB20_TF08_0147.JPG	6	0	-2.73021	43.5181	1.15863	5.17854	0
ICB20_TF08_0144.JPG	5	0	-2.73012	43.5181	1.21548	4.11359	0
ICB20_TF08_0061.JPG	4	0	-2.72761	43.5175	1.2372	3.23311	0
ICB20_TF08_0100.JPG	4	0	-2.72878	43.5178	1.29411	3.09094	0
ICB20_TF08_0079.JPG	3	0	-2.72815	43.5176	1.18913	2.52285	0
ICB20_TF08_0191.JPG	3	0	-2.73153	43.5184	1.21727	2.46453	0
ICB20_TF08_0050.JPG	3	0	-2.72728	43.5174	1.22446	2.45006	0
ICB20_TF08_0065.JPG	3	0	-2.72773	43.5175	1.26139	2.37833	0
ICB20_TF08_0071.JPG	3	0	-2.7279	43.5176	1.28629	2.33228	0
ICB20_TF08_0093.JPG	3	0	-2.72858	43.5177	1.29607	2.31469	0
ICB20_TF08_0197.JPG	2	0	-2.73172	43.5185	1.13409	1.76352	0
ICB20_TF08_0102.JPG	2	0	-2.72885	43.5178	1.16698	1.71382	0
ICB20_TF08_0190.JPG	2	0	-2.7315	43.5184	1.19433	1.67457	0
ICB20_TF08_0168.JPG	2	0	-2.73084	43.5183	1.2595	1.58793	0
ICB20_TF08_0158.JPG	2	0	-2.73054	43.5182	1.28048	1.56191	0
ICB20_TF08_0189.JPG	1	0	-2.73147	43.5184	1.11346	0.898103	0
ICB20_TF08_0042.JPG	1	0	-2.72703	43.5173	1.21906	0.820302	0
ICB20_TF08_0124.JPG	1	0	-2.72951	43.5179	1.25014	0.799912	0
ICB20_TF08_0176.JPG	1	0	-2.73108	43.5183	1.252	0.798721	0
ICB20_TF08_0143.JPG	1	0	-2.73009	43.5181	1.26517	0.790406	0
ICB20_TF08_0097.JPG	1	0	-2.72869	43.5177	1.26897	0.788038	0
ICB20_TF08_0063.JPG	1	0	-2.72767	43.5175	1.30795	0.764556	0
ICB20_TF08_0045.JPG	0	0	-2.72712	43.5174	1.24642	0	0
ICB20_TF08_0046.JPG	0	0	-2.72715	43.5174	1.24457	0	0
ICB20_TF08_0062.JPG	0	0	-2.72764	43.5175	1.29411	0	0
ICB20_TF08_0064.JPG	0	0	-2.7277	43.5175	1.24828	0	0
ICB20_TF08_0066.JPG	0	0	-2.72776	43.5175	1.30397	0	0
ICB20_TF08_0082.JPG	0	0	-2.72824	43.5176	1.23904	0	0
ICB20_TF08_0084.JPG	0	0	-2.7283	43.5177	1.20484	0	0
ICB20_TF08_0094.JPG	0	0	-2.7286	43.5177	1.252	0	0
ICB20_TF08_0095.JPG	0	0	-2.72864	43.5177	1.23172	0	0
ICB20_TF08_0098.JPG	0	0	-2.72872	43.5178	1.26707	0	0
ICB20_TF08_0103.JPG	0	0	-2.72887	43.5178	1.24088	0	0
ICB20_TF08_0105.JPG	0	0	-2.72893	43.5178	1.31194	0	0
ICB20_TF08_0133.JPG	0	0	-2.72979	43.518	1.19607	0	0
ICB20_TF08_0134.JPG	0	0	-2.72982	43.518	1.12928	0	0
ICB20_TF08_0135.JPG	0	0	-2.72985	43.518	1.14872	0	0
ICB20_TF08_0136.JPG	0	0	-2.72988	43.518	1.22627	0	0
ICB20_TF08_0137.JPG	0	0	-2.72991	43.518	1.20484	0	0
ICB20_TF08_0138.JPG	0	0	-2.72994	43.518	1.15863	0	0
ICB20_TF08_0139.JPG	0	0	-2.72996	43.5181	1.14545	0	0
ICB20_TF08_0140.JPG	0	0	-2.73	43.5181	1.21548	0	0
ICB20_TF08_0141.JPG	0	0	-2.73003	43.5181	1.20308	0	0
ICB20_TF08_0142.JPG	0	0	-2.73006	43.5181	1.26707	0	0
ICB20_TF08_0150.JPG	0	0	-2.73029	43.5181	1.18054	0	0
ICB20_TF08_0151.JPG	0	0	-2.73032	43.5181	1.06353	0	0
ICB20_TF08_0166.JPG	0	0	-2.73079	43.5182	1.19782	0	0
ICB20_TF08_0167.JPG	0	0	-2.73081	43.5183	1.24642	0	0
ICB20_TF08_0169.JPG	0	0	-2.73087	43.5183	1.20837	0	0
ICB20_TF08_0170.JPG	0	0	-2.73089	43.5183	1.29607	0	0
ICB20_TF08_0171.JPG	0	0	-2.73092	43.5183	1.30596	0	0
ICB20_TF08_0172.JPG	0	0	-2.73095	43.5183	1.29804	0	0
ICB20_TF08_0173.JPG	0	0	-2.73098	43.5183	1.33425	0	0
ICB20_TF08_0174.JPG	0	0	-2.73101	43.5183	1.24828	0	0
ICB20_TF08_0177.JPG	0	0	-2.73111	43.5183	1.31395	0	0
ICB20_TF08_0182.JPG	0	0	-2.73126	43.5184	1.16363	0	0
ICB20_TF08_0188.JPG	0	0	-2.73144	43.5184	1.13409	0	0
ICB20_TF08_0192.JPG	0	0	-2.73156	43.5184	1.28824	0	0
ICB20_TF08_0193.JPG	0	0	-2.73159	43.5184	1.22086	0	0
ICB20_TF08_0195.JPG	0	0	-2.73165	43.5185	1.32202	0	0
	430	371

## Sheet: Hoja 1
Transectos	Área m²	Phakellia	Dendrophyllia
IA418_TF02	296.69
IA418_TF04	280.34
IA418_TF07	250.84			Suma	5647.48
IA418_TF10	290.98			Media	264
IA418_TF13	279.99
IA418_TF16	345.8
IA418_TF18	247.15
IA418_TF22	314.67
IA418_TF26	540.83
IA418_TF27	598.29
ICB19_TF07	400.51
ICB19_TF08	406.33
ICB19_TF09	101.96
ICB20_TF01	272.47
ICB20_TF02	74
ICB20_TF03	66
ICB20_TF05	228.3
ICB20_TF06	217.82
ICB20_TF07	215.99	11	671
ICB20_TF08	218.52	430	371
